# Supplementary material for: Quantification of Microvascular Density of the Optic Nerve Head in Diabetic Retinopathy Using Optical Coherence Tomographic Angiography
Source: Hindawi journal article supplement (doi:10.1155/2020/5014035), 2020-04-29
Supplement: f1 [file 5014035.f1.pdf]

Supplementary Table

Table S1 Post-hoc analysis of the ONH RPC density in different groups

| RPC density    | Homogeneity<br>Test, p<br>value | Post-hoc<br>method | Group                 | Group(compared)       | P<br>value |
|----------------|---------------------------------|--------------------|-----------------------|-----------------------|------------|
| Whole<br>image | 0.002                           | Dunnett<br><br>T3  | Control               | No DR                 | 0.142      |
|                |                                 |                    |                       | Mild-Moderate<br>NPDR | <0.01      |
|                |                                 |                    |                       | Severe NPDR           | <0.01      |
|                |                                 |                    | No DR                 | Control               | 0.142      |
|                |                                 |                    |                       | Mild-Moderate<br>NPDR | 0.022      |
|                |                                 |                    |                       | Severe NPDR           | <0.01      |
|                |                                 |                    | Mild-Moderate<br>NPDR | Control               | <0.01      |
|                |                                 |                    |                       | No DR                 | 0.022      |
|                |                                 |                    |                       | Severe NPDR           | 0.035      |

|              |       |     |             |                       |       |
|--------------|-------|-----|-------------|-----------------------|-------|
|              |       |     | Severe NPDR | Control               | <0.01 |
|              |       |     |             | No DR                 | <0.01 |
|              |       |     |             | Mild-Moderate<br>NPDR | 0.035 |
| Inside optic | 0.101 | LSD | Control     | No DR                 | 0.062 |

|      |  |  |  |                       |         |       |       |
|------|--|--|--|-----------------------|---------|-------|-------|
| disc |  |  |  | Mild-Moderate<br>NPDR | 0.174   |       |       |
|      |  |  |  | Severe NPDR           | <0.01   |       |       |
|      |  |  |  | No DR                 | Control | 0.062 |       |
|      |  |  |  | Mild-Moderate<br>NPDR | 0.655   |       |       |
|      |  |  |  | Severe NPDR           | 0.001   |       |       |
|      |  |  |  | Mild-Moderate<br>NPDR | Control | 0.174 |       |
|      |  |  |  |                       |         | No DR | 0.655 |

|               |       |               |                       |                       |       |
|---------------|-------|---------------|-----------------------|-----------------------|-------|
|               |       |               |                       | Severe NPDR           | <0.01 |
|               |       |               | Severe NPDR           | Control               | <0.01 |
|               |       |               |                       | No DR                 | <0.01 |
|               |       |               |                       | Mild-Moderate<br>NPDR | <0.01 |
| Peripapillary | 0.002 | Dunnett<br>T3 | Control               | No DR                 | 0.041 |
|               |       |               |                       | Mild-Moderate<br>NPDR | <0.01 |
|               |       |               |                       | Severe NPDR           | <0.01 |
|               |       |               | No DR                 | Control               | 0.041 |
|               |       |               |                       | Mild-Moderate<br>NPDR | 0.029 |
|               |       |               |                       |                       |       |
|               |       |               |                       | Severe NPDR           | <0.01 |
|               |       |               | Mild-Moderate<br>NPDR | Control               | <0.01 |
|               |       |               |                       | No DR                 | 0.029 |

|  |  |  |             |                       |       |
|--|--|--|-------------|-----------------------|-------|
|  |  |  |             | Severe NPDR           | 0.012 |
|  |  |  | Severe NPDR | Control               | <0.01 |
|  |  |  |             | No DR                 | <0.01 |
|  |  |  |             | Mild-Moderate<br>NPDR | 0.012 |
